# Supplementary material for: A first-principles investigation of substrate oxidation effects on the catalytic activity of a Co single-atom supported on C2N for the oxygen evolution reaction
Source: Royal Society of Chemistry journal article supplement (doi:10.1039/d4cc06763k), 2025-01-01
Supplement: d4cc06763k1.pdf [file d4cc06763k1.pdf]

# A First-Principles Investigation of Substrate Oxidation Effects on the Catalytic Activity of Co Single-Atom Supported on C<sub>2</sub>N for Oxygen Evolution Reaction

Yifei Rao<sup>a,b</sup>, Li Sheng<sup>a</sup>, Yanan Zhou<sup>c\*</sup>, Wenhua Zhang<sup>a,b\*</sup>

<sup>a</sup> Key Laboratory of Precision and Intelligent Chemistry, University of Science and Technology of China, Hefei, Anhui 230026, China

<sup>b</sup> Department of Materials Science and Technology, University of Science and Technology of China, Hefei, Anhui 230026, China

<sup>c</sup> School of Material Science and Chemical Engineering, Ningbo University, Ningbo 315211, China

## Computational Details

First-principles calculations are performed by using spin-polarized density functional theory (DFT) in the Perdew–Burke–Ernzerhof (PBE) generalized gradient approximation (GGA) as implemented in the Vienna ab initio simulation package (VASP).<sup>1-3</sup> The DFT + U calculations were performed and the value of U-J is 3.5 for Co.<sup>4-6</sup> The projected augmented wave method is used with a kinetic energy cutoff of 400 eV. The DFT-D3 method was used to describe van der Waals interactions.<sup>7</sup> The solvent effect was considered via implicit solvent model (VASPsol).<sup>8</sup> 3 × 3 × 1 k-point grid with Monkhorst-Pack sampling model is used for all structural optimization work.<sup>9</sup> The energy convergence limit is set to 10<sup>-5</sup> eV/atom, with a force convergence criterion of 0.02 eV/Å. Structures are relaxed at the same initial guess of overall magnetic moments, and the resulting minimum energy structures are used for all analyses.

The Gibbs free energy ( $\Delta G$ ) was defined as  $\Delta G = \Delta E + \Delta ZPE - T\Delta S - eU + \Delta G_{pH}$ , where  $\Delta E$ ,  $\Delta ZPE$  and  $\Delta S$  represented the reaction energy, the difference in zero-point energies (ZPE), the difference in entropy obtained from vibrational frequency

calculations, respectively.  $eU$  represents the effect of the electrode potential measured against the standard hydrogen electrode (SHE).  $\Delta G_{pH}$  is the correction of free energy of  $H^+$  with respect to concentration, which can be determined as  $\Delta G_{pH} = 2.303 \times k_B T \times pH$ , where  $k_B$  is the Boltzmann constant. Our current calculations are all based on standard conditions ( $T = 298.15$  K,  $P = 1$  bar,  $pH = 0$ ). The entropies of gas phase  $H_2$ , and  $H_2O$  were obtained from the NIST database (Computational Chemistry Comparison and Benchmark Database. <http://cccbdb.nist.gov/>) with standard condition.

Under ideal conditions, the OER reaction with a total energy change of 4.92 eV can be driven at 1.23 V, while the  $\Delta G$  of each elementary reaction would be equally divided into 1.23 eV.<sup>10</sup> Therefore, the overpotential  $\eta$  is introduced to represent additional required potential and measure the catalytic activity of materials, which is defined in theoretical calculations as  $\eta = \Delta G_{max}/e - 1.23$  V.

### The polarization curves simulation of OER

For a given electrochemical process  $O + ne \rightleftharpoons R$  under one electric potential  $U$ , it can be used the well-known Nerst equation to link the concentrations of the reactant and the product by the following equation:<sup>11</sup>

$$U = U_0 + \frac{RT}{nF} \ln \left( \frac{C_O}{C_R} \right)$$

Here,  $U_0$  refers to the equilibrium potential of the reaction at the standard state,  $R$  refers to the universal gas constant,  $T$  refers to the temperature,  $n$  refers to the electron transfer number,  $F$  refers to the Faraday constant, and  $C_O/C_R$  refers to the concentration of the reactant/product in this reaction.<sup>12</sup> Therefore, the exchange current density  $j_0$  can be calculated by the following equation:

$$j_0 = nFkC_O \exp \left[ -\frac{\alpha F}{RT} (U_{eq} - U_0) \right] = nFkC_O^{1-\alpha} C_R^\alpha$$

where  $k$  refers to the reaction rate constant,  $U_{eq}$  refers to the equilibrium potential, and  $\alpha$  refers to the transfer coefficient. So, the electrochemical polarization equation can be defined by equation:

$$j = j_0 \left[ \exp\left(-\frac{\alpha F}{RT}\eta\right) - \exp\left(\frac{(1-\alpha)F}{RT}\eta\right) \right]$$

where  $\eta = U - U_{eq}$  refers to the overpotential deviated from the equilibrium potential and  $j$  of the overall current density. The exchange current density  $j_0$  can be used to evaluate the catalytic activity of one catalyst. Following the electrochemical catalysis mode developed by Nørskov<sup>10</sup>, the reaction rate constant  $k$  can be defined as follows:

$$k = k_0 \exp\left[-\frac{\Delta G_{max}}{k_b T}\right]$$

where  $k_b$  and  $\Delta G_{max}$  refers to the Boltzmann constant and the Gibbs free energy change of the potential-determining step, respectively. In the electrochemical polarization model<sup>13</sup>,  $k_0$  is defined as the equation:

$$k_0 = \frac{k_b T}{h}$$

where  $h$  refers to the Planck constant. Therefore, the exchange current density  $j_0$  of the electrochemical reaction when the reaction approaches its equilibrium state can be described as the following equation:

$$j_0 = nFC_0 \frac{k_b T}{h} \exp\left[-\frac{\Delta G_{max}}{k_b T}\right]$$

Hence, the overall current density  $j$  can be calculated by the follows equation according to the overpotential  $\eta$ <sup>10</sup>:

$$j = nFC_0 \frac{k_b T}{h} \exp\left[-\frac{\Delta G_{max}}{k_b T}\right] \left[ \exp\left(-\frac{\alpha F}{RT}\eta\right) - \exp\left(\frac{(1-\alpha)F}{RT}\eta\right) \right] \approx nFC_0 \frac{k_b T}{h} \exp\left[-\frac{\Delta G_{max}}{k_b T} - \frac{\alpha F}{RT}\eta\right]$$

The OER need to overcome the reaction kinetic energy barriers, and the onset potential generally represents the reaction potential at which the current begins to deviate from the baseline.<sup>14</sup> In this work, the calculated polarization curves for the OER was calculated as literature reported.<sup>15</sup>

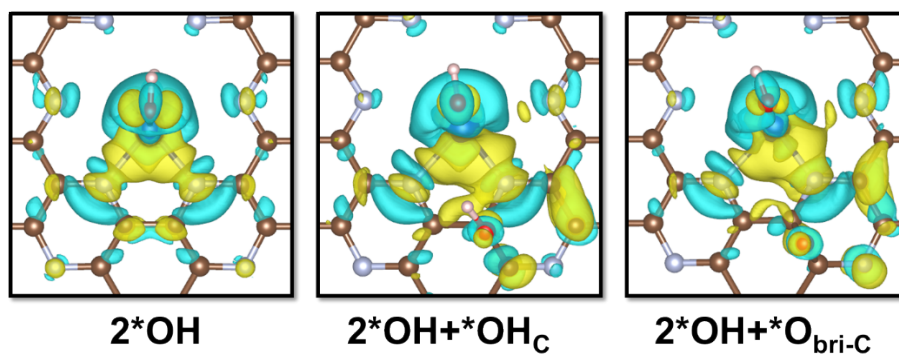

**Fig. S1.** The differential charge density maps of Co@C<sub>2</sub>N adsorbing different intermediates. The presence of Co atoms alters the electronic structure of the C sites, and conversely, when the C sites are occupied by \*O<sub>bri-C</sub> species, they significantly affect the electronic structure of the Co atoms.

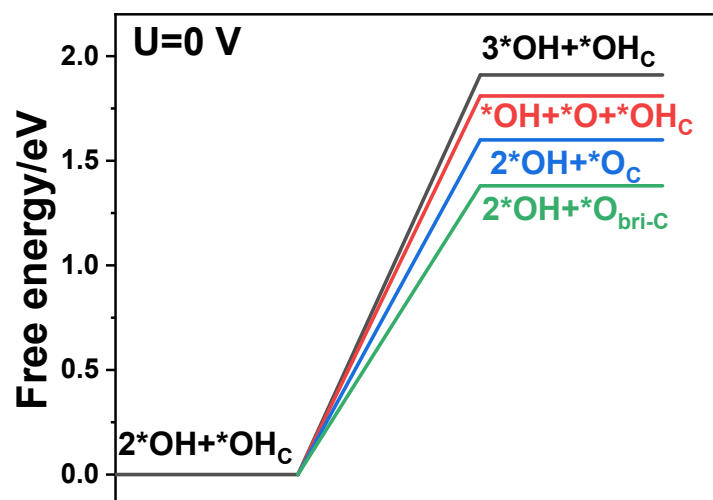

**Fig. S2.** The possible evolution of intermediates  $2^*OH+^*OH_C$  and the corresponding free energy change.

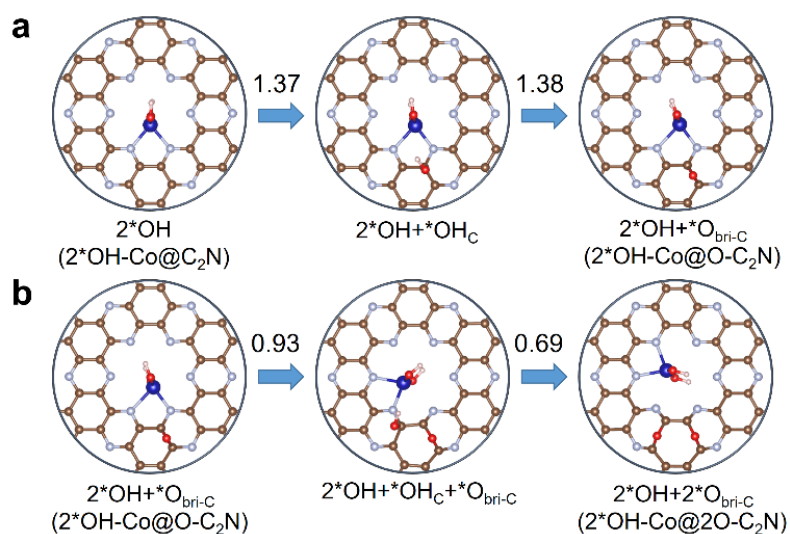

**Fig. S3.** The formation steps of a) the first  $*O_{bri-C}$  and b) the second  $*O_{bri-C}$ . Their corresponding energy requirements (eV) are also given out.

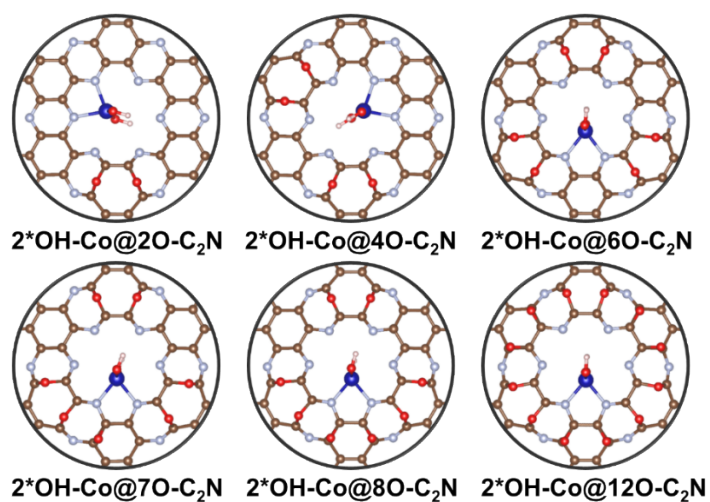

**Fig. S4.** The optimized structure of  $2^*OH-Co@xO-C_2N$  ( $x = 4, 6, 7, 8, 12$ ). When  $x \leq 6$ ,  $*O_{bri-C}$  exists in the form of ether oxygen. When  $x > 6$ , the additional  $*O_{bri-C}$  exists in the form of epoxy oxygen.

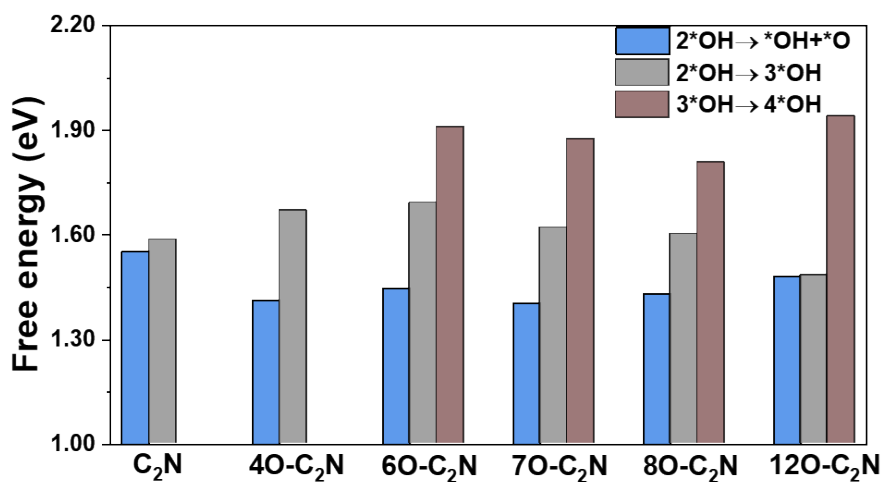

**Fig. S5.** The free energy required for the evolution of intermediates on the Co single atom.

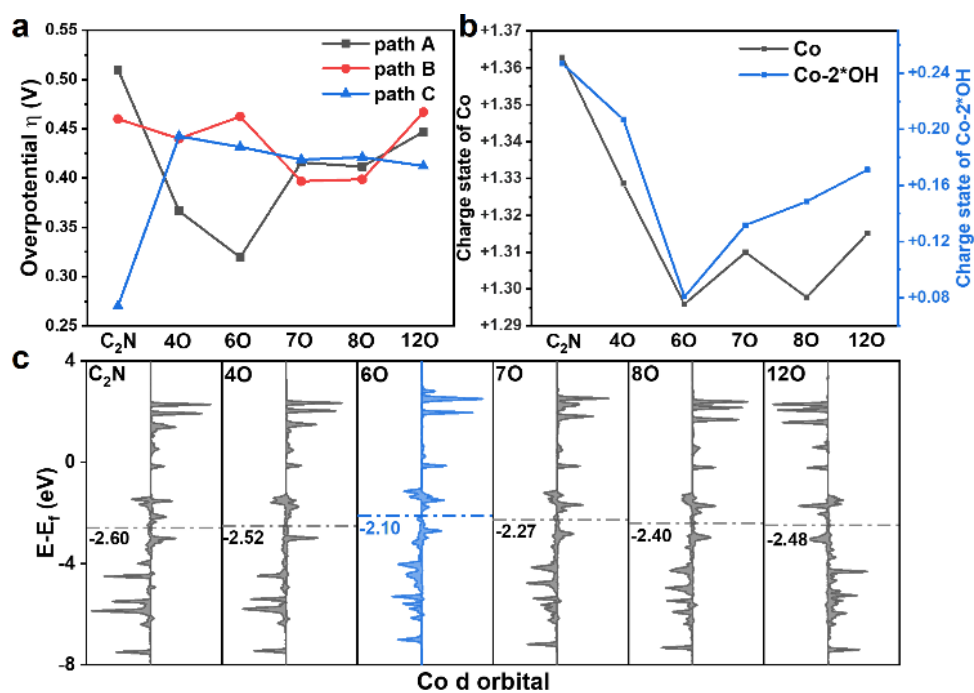

**Fig. S6.** a) The variation in overpotentials for different pathways as the coverage of \*O<sub>bri-C</sub> increases. b) Changes in the charge state of the Co atom and the overall charge state of the Co-2\*OH cluster. c) Showing the *d*-orbital of the Co center in the 2\*OH-Co@*x*O-C<sub>2</sub>N system (*x* = 0, 4, 6, 7, 8, 12). The auxiliary lines in the figure show the changes in the *d*-band center of the Co atom.

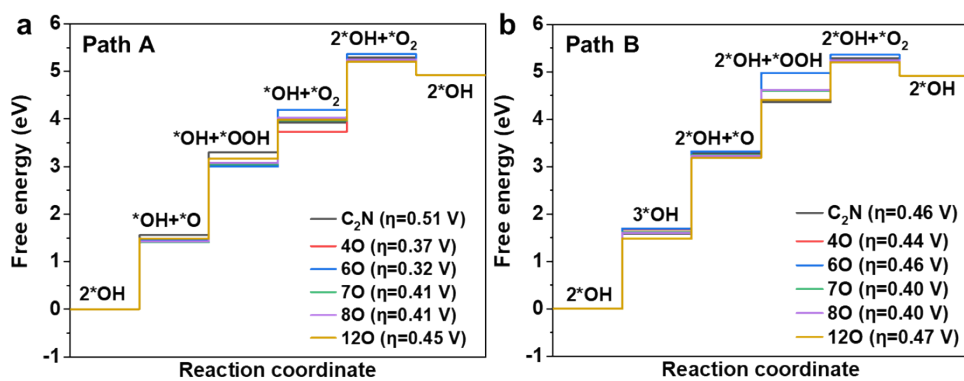

**Fig. S7.** The energy profile of a) path **A** and b) path **B** in the  $2^*OH-Co@xO-C_2N$  system ( $x = 0, 4, 6, 7, 8, 12$ ).

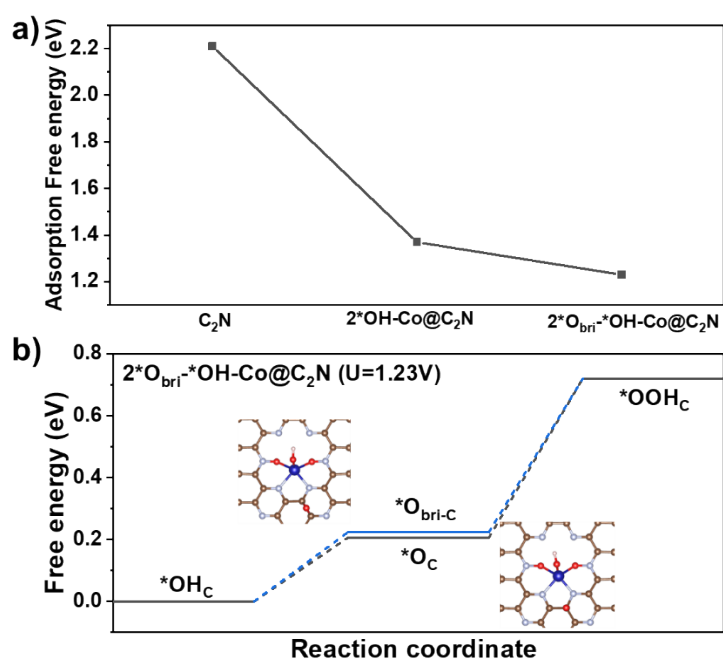

**Fig. S8.** a) The adsorption free energy of  $*OH$  on the C site ( $*OH_C$ ). b) The evolution of  $*OH_C$  at a voltage of 1.23V.

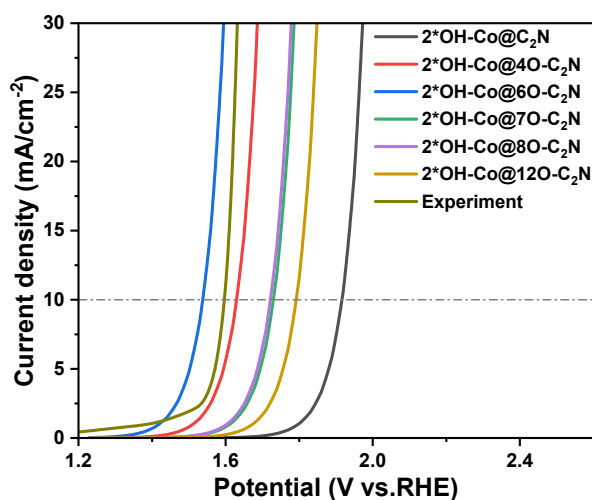

**Fig. S9.** The theoretical OER polarization curves of the  $2^*\text{OH-Co}@x\text{O-C}_2\text{N}$  system.

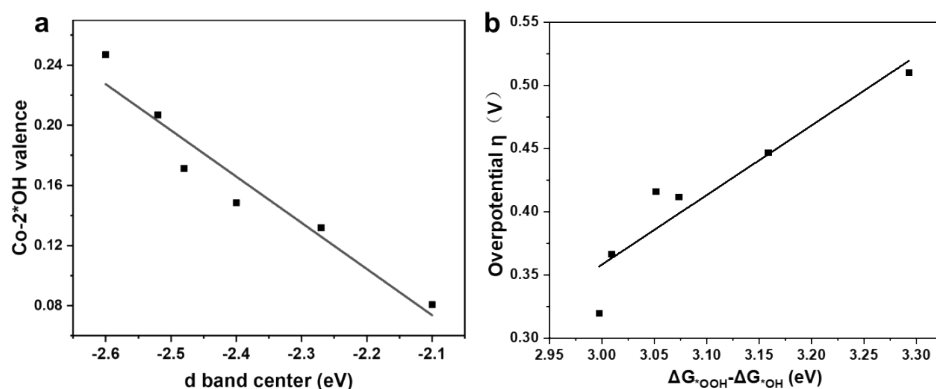

**Fig. S10.** a) The linear relationship between the d-band center of Co atoms and the oxidation state of the Co-2\*OH cluster. b) The positive correlation between the difference in adsorption free energy of intermediates \*OOH and \*OH ( $\Delta G_{^*\text{OOH}} - \Delta G_{^*\text{OH}}$ ) and the overpotential  $\eta$  in the OER cycle of Path A.

**Table S1.** The overpotentials for different pathways as the coverage of  $^*\text{O}_{\text{bri-C}}$  increases.

| $2^*\text{OH-Co}@x\text{O-C}_2\text{N}$ | Path A | Path B | Path C |
|-----------------------------------------|--------|--------|--------|
| $x=0$                                   | 0.51   | 0.46   | 0.27   |
| $x=4$                                   | 0.37   | 0.44   | 0.44   |
| $x=6$                                   | 0.32   | 0.46   | 0.43   |
| $x=7$                                   | 0.42   | 0.40   | 0.42   |
| $x=8$                                   | 0.41   | 0.40   | 0.42   |
| $x=12$                                  | 0.45   | 0.47   | 0.41   |



**Table S2.** The adsorption free energies between the intermediates \*OOH and \*OH ( $\Delta G^*_{\text{OOH}} - \Delta G^*_{\text{OH}}$ ) of Path A in the 2\*OH-Co@xO-C<sub>2</sub>N system.

| 2*OH-Co@xO-C <sub>2</sub> N | $\Delta G^*_{\text{OOH}} - \Delta G^*_{\text{OH}}$ |
|-----------------------------|----------------------------------------------------|
| x=0                         | 3.29                                               |
| x=4                         | 3.01                                               |
| x=6                         | 3.00                                               |
| x=7                         | 3.05                                               |
| x=8                         | 3.07                                               |
| x=12                        | 3.16                                               |

## References

1. G. Kresse and J. Furthmüller, *Phys. Rev. B*, 1996, **54**, 11169-11186.
2. G. Kresse and J. Furthmüller, *Comp. Mater. Sci.*, 1996, **6**, 15-50.
3. J. P. Perdew, K. Burke and M. Ernzerhof, *Phys. Rev. Lett.*, 1996, **77**, 3865-3868.
4. F. Zasada, J. Gryboś, W. Piskorz and Z. Sojka, *J. Phys. Chem. C*, 2018, **122**, 2866-2879.
5. I. Barlocco, L. A. Cipriano, G. Di Liberto and G. Pacchioni, *Adv. Theor. Simul.*, 2023, **6**, 2200513.
6. S. L. Dudarev, G. A. Botton, S. Y. Savrasov, C. J. Humphreys and A. P. Sutton, *Phys. Rev. B*, 1998, **57**, 1505-1509.
7. S. Grimme, J. Antony, S. Ehrlich and H. Krieg, *J. Chem. Phys.*, 2010, **132**.
8. K. Mathew, R. Sundararaman, K. Letchworth-Weaver, T. A. Arias and R. G. Hennig, *J. Chem. Phys.*, 2014, **140**.
9. H. J. Monkhorst and J. D. Pack, *Phys. Rev. B*, 1976, **13**, 5188-5192.
10. J. K. Nørskov, J. Rossmeisl, A. Logadottir, L. Lindqvist, J. R. Kitchin, T. Bligaard and H. Jónsson, *J. Phys. Chem. B*, 2004, **108**, 17886-17892.
11. A.-S. Feiner and A. McEvoy, *J. Chem. Educ.*, 1994, **71**, 493.
12. Y. Jiao, Y. Zheng, M. Jaroniec and S. Z. Qiao, *Chem. Soc. Rev.*, 2015, **44**, 2060-2086.
13. H. Ma, X.-Q. Chen, R. Li, S. Wang, J. Dong and W. Ke, *Acta Mater.*, 2017, **130**, 137-146.
14. Z.-F. Huang, J. Wang, Y. Peng, C.-Y. Jung, A. Fisher and X. Wang, *Adv. Energy Mater.*, 2017, **7**, 1700544.
15. B. Wei, Z. Fu, D. Legut, T. C. Germann, S. Du, H. Zhang, J. S. Francisco and R. Zhang, *Adv. Mater.*, 2021, **33**, 2102595.
